# Supplementary material for: Sugar based cationic magnetic core–shell silica nanoparticles for nucleic acid extraction
Source: Royal Society of Chemistry journal article supplement (doi:10.1039/d2ra01139e), 2022-01-01
Supplement: d2ra01139e1.pdf [file d2ra01139e1.pdf]

## Sugar based cationic magnetic core-shell silica nanoparticles for nucleic acid extraction

Tammar Hussein Ali<sup>1,2\*</sup>, Amar Mousa Mandal<sup>3</sup>, Thorsten Heidelberg<sup>4</sup>, and Rusnah Syahila

Duali Hussen<sup>4</sup>

<sup>1</sup> Faculty of Pharmacy, Al-Muthanna University, 66001 Samawah, Al Muthanna. Iraq.

<sup>2</sup> Molecular Design and Synthesis, Department of Chemistry, KU Leuven, Celestijnenlaan 200F, 3001 Leuven, Belgium

<sup>3</sup> College of Basic education, Science department, Al-Muthanna University, 66001 Samawah, Al Muthanna. Iraq.

<sup>4</sup> Chemistry Department, Faculty of Science, University of Malaya, 50603 Kuala Lumpur, Malaysia

[tammar86@gmail.com](mailto:tammar86@gmail.com); [heidelberg@um.edu.my](mailto:heidelberg@um.edu.my)

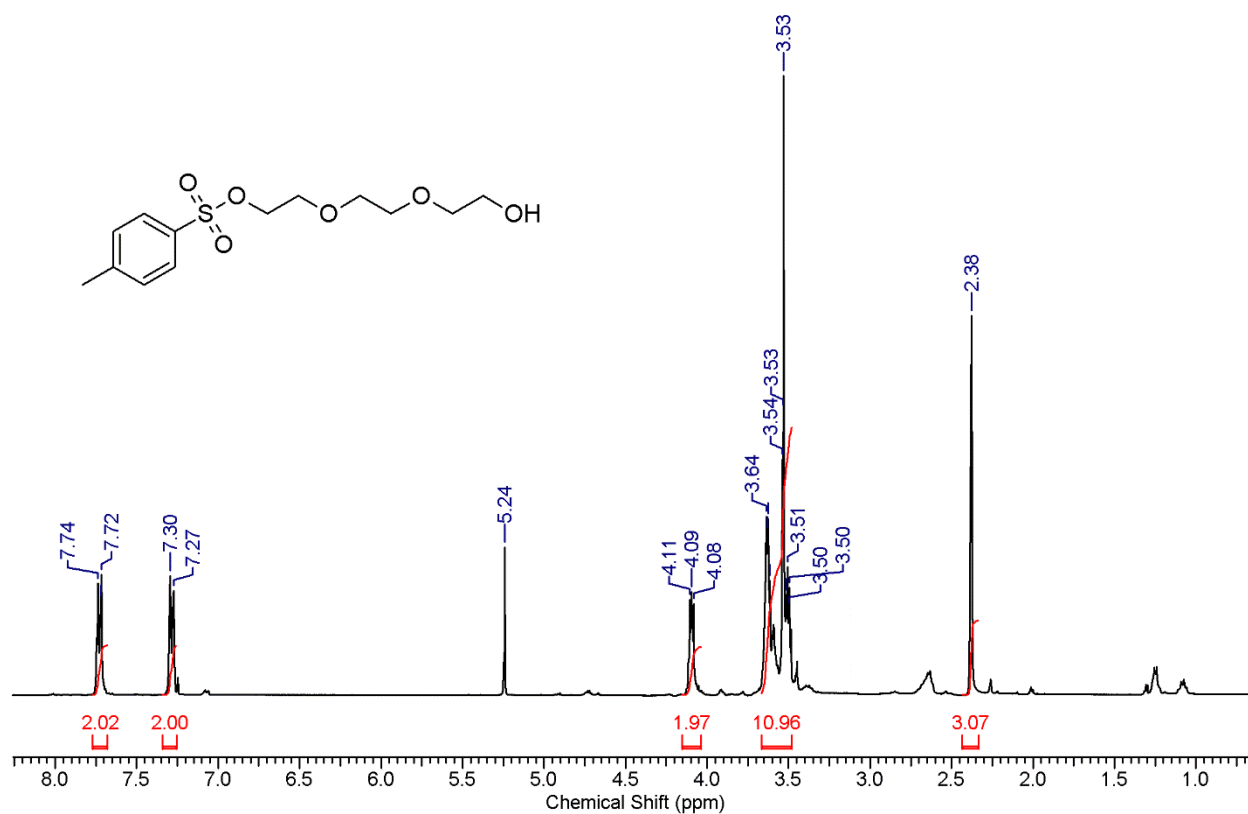

S 1: <sup>1</sup>H NMR of compound 3.

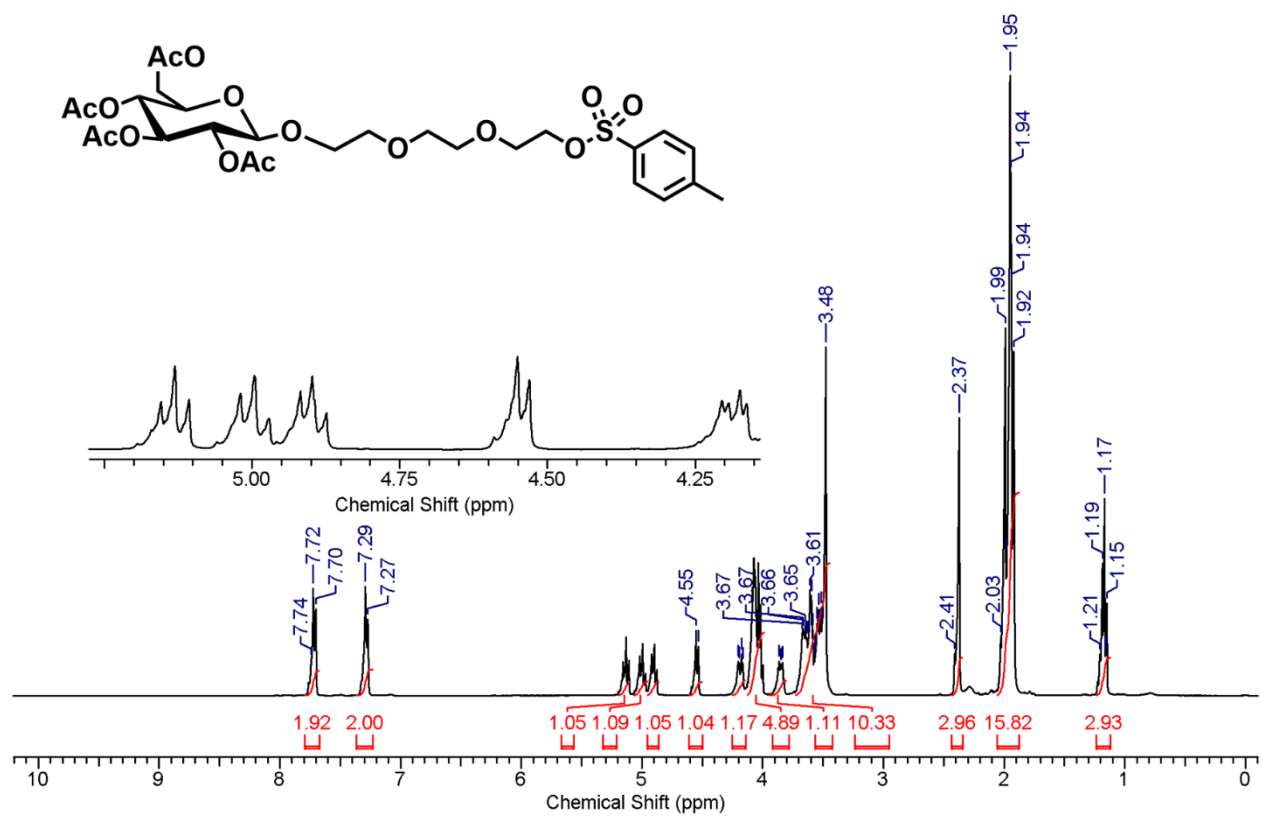

S 2: <sup>1</sup>H NMR of compound 5.

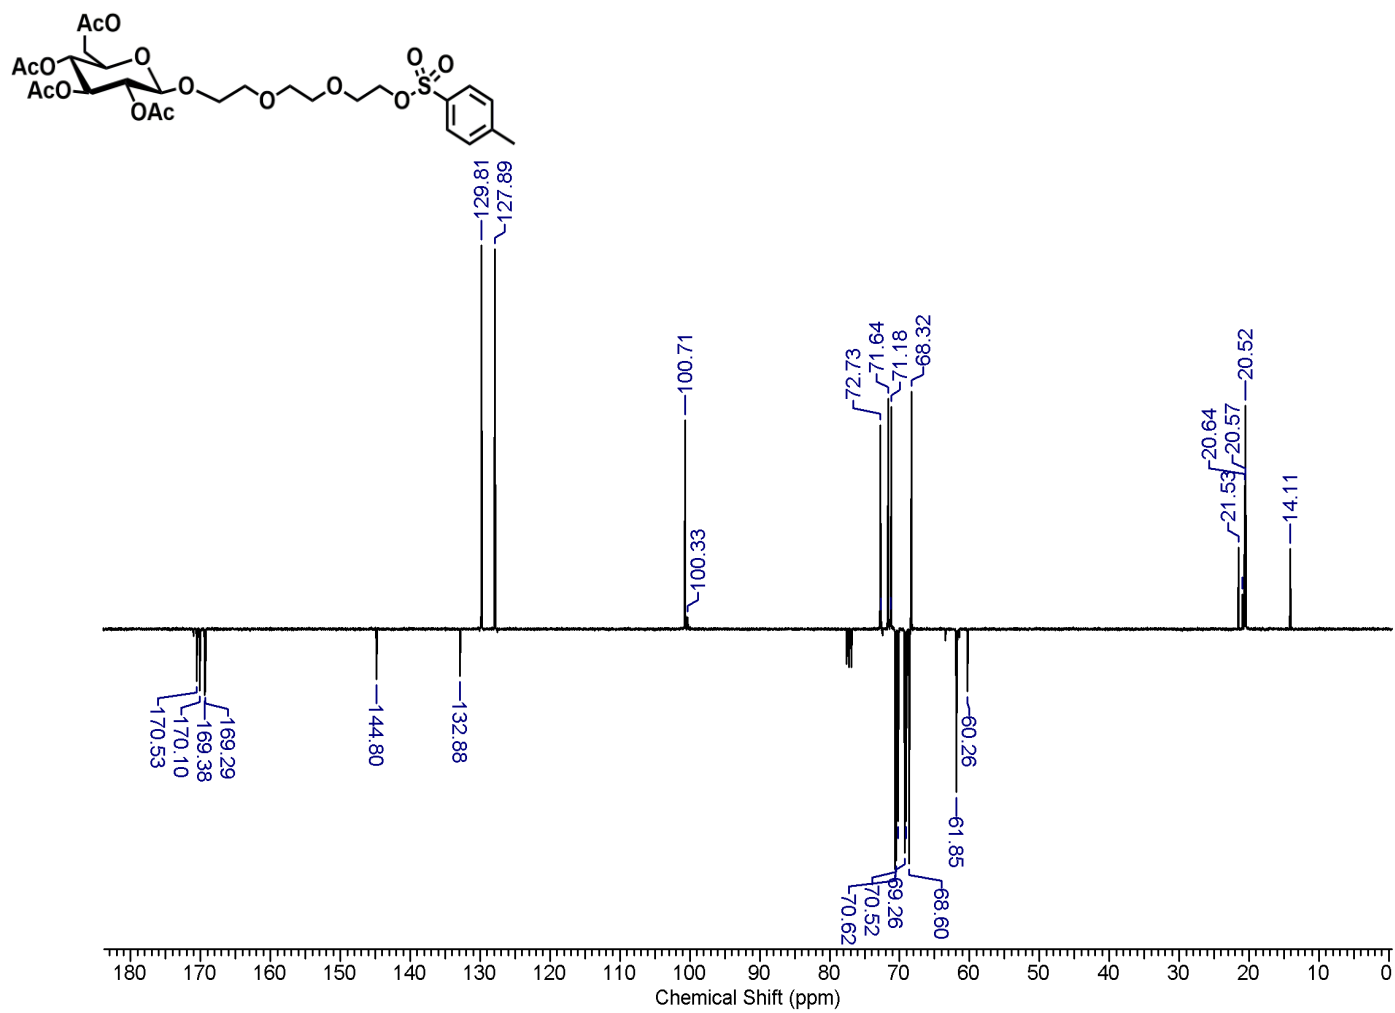

S 3:  $^{13}\text{C}$  NMR of compound 5.

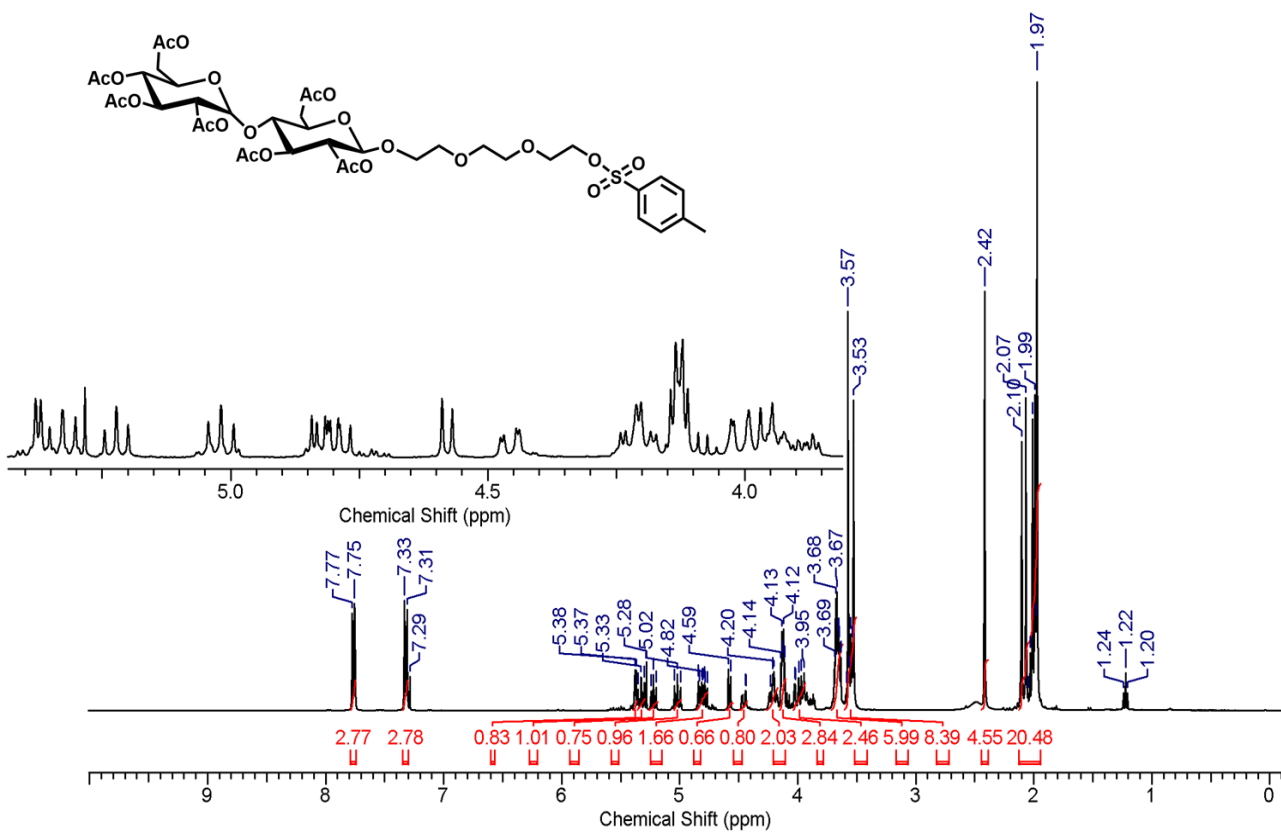

S 4: <sup>1</sup>H NMR of compound 7.

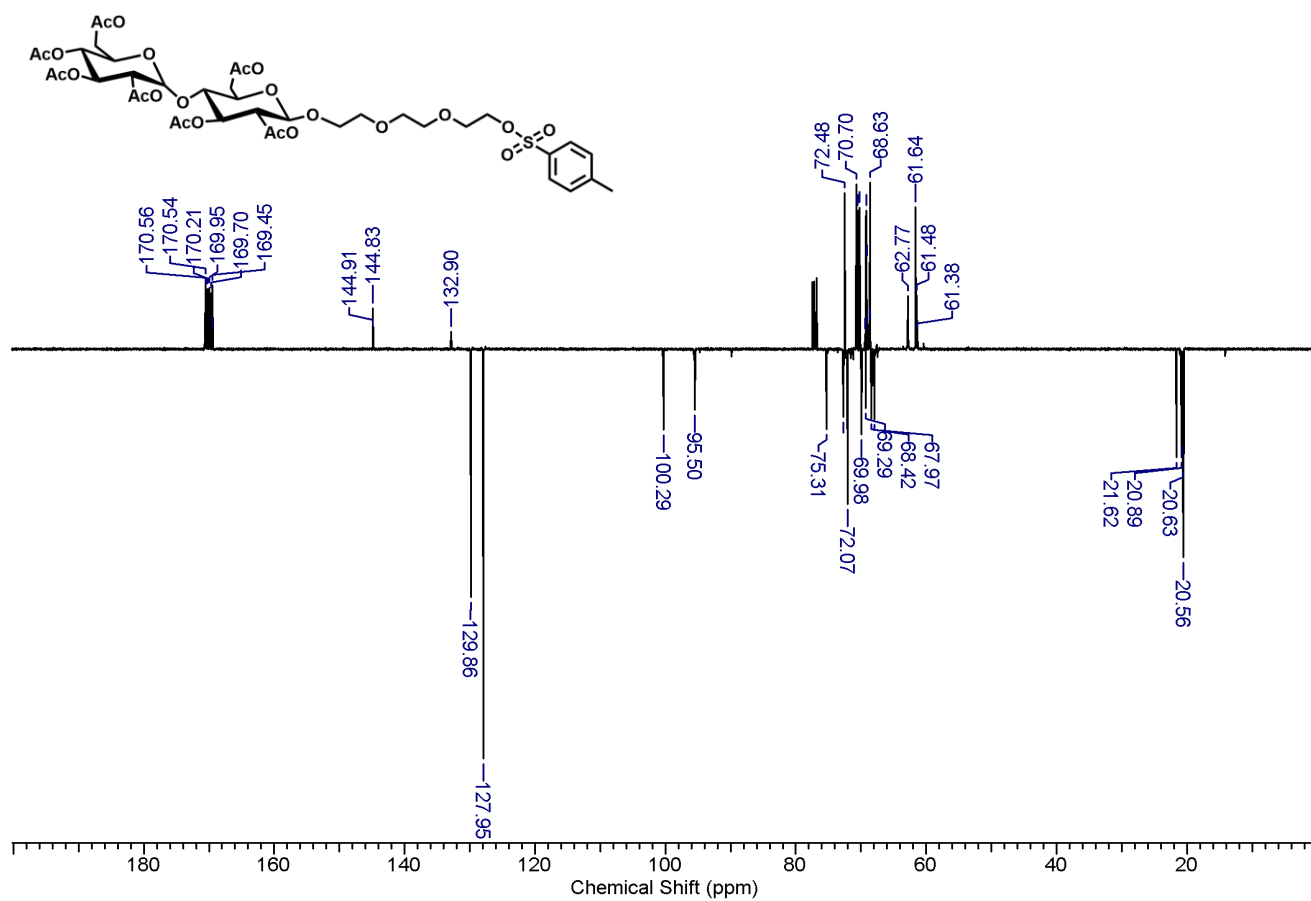

S 5:  $^{13}\text{C}$  NMR of compound 7.

# Sugar based cationic magnetic core-shell silica nanoparticles for nucleic acid extraction

Tammar Hussein Ali\*, Amar Mousa Mandal, Thorsten Heidelberg, and Rusnah Syahila Duali

Hussen

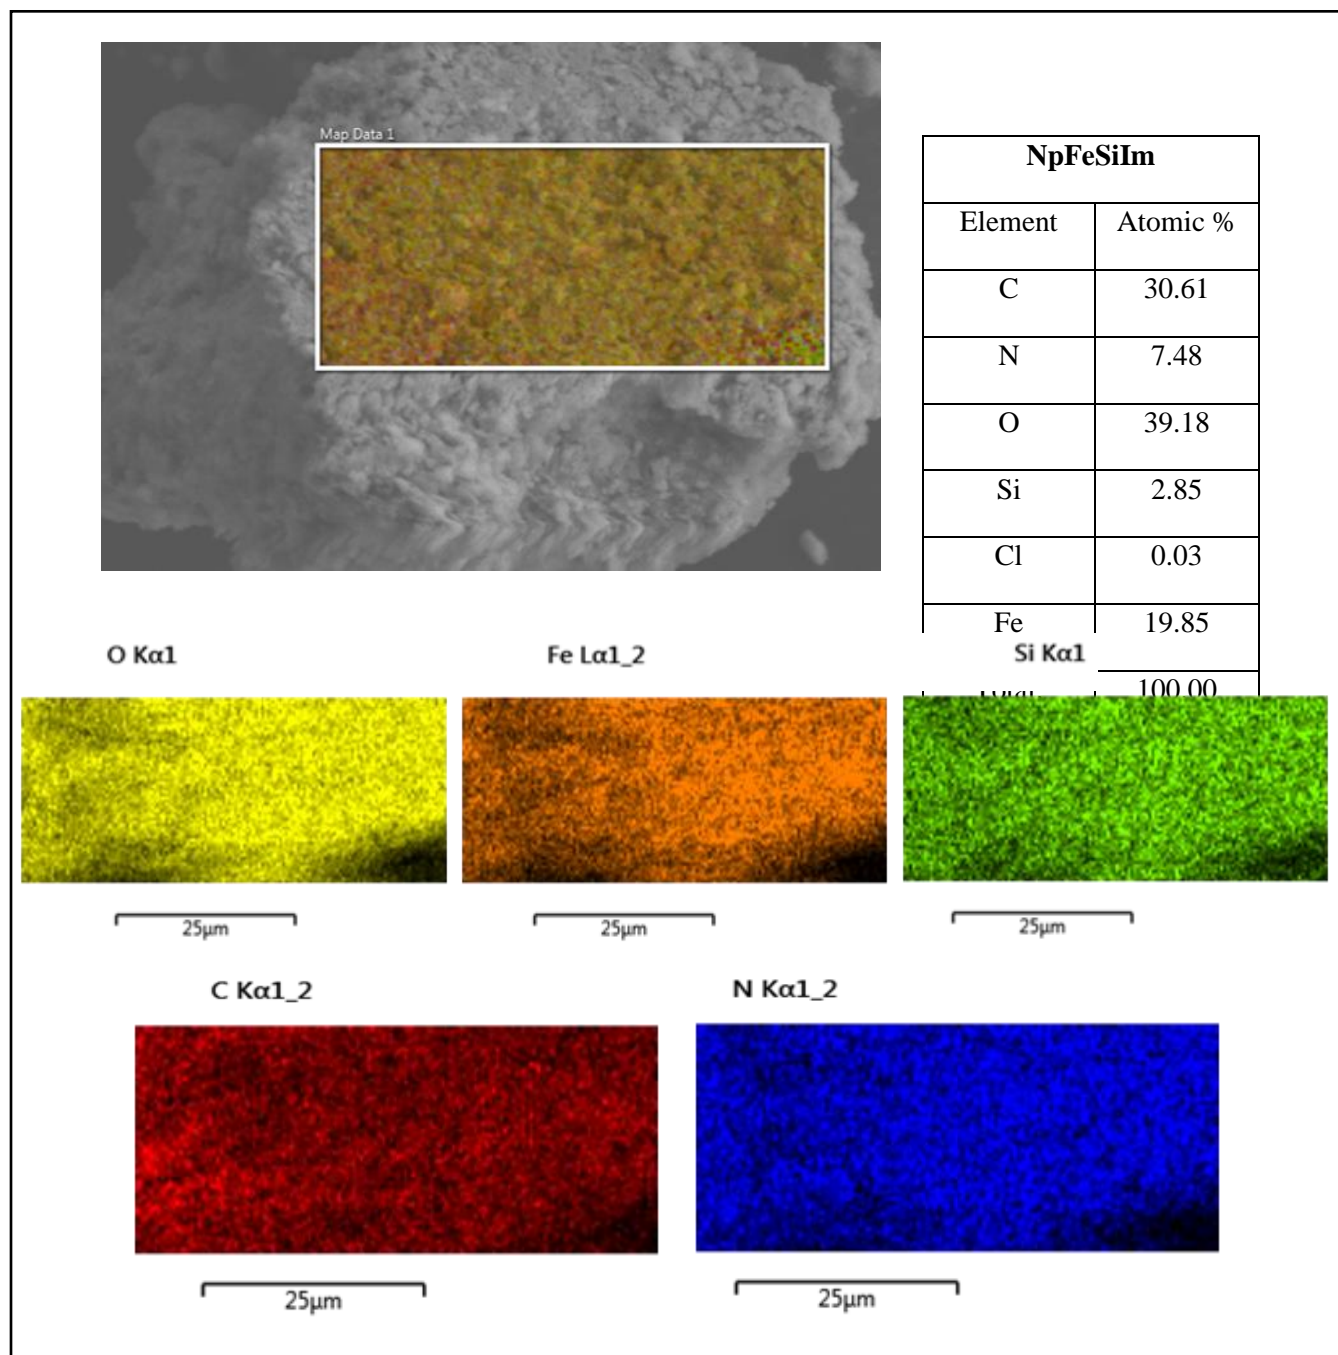

# Sugar based cationic magnetic core-shell silica nanoparticles for nucleic acid extraction

Tammar Hussein Ali\*, Amar Mousa Mandal, Thorsten Heidelberg, and Rusnah Syahila Duali

Hussen

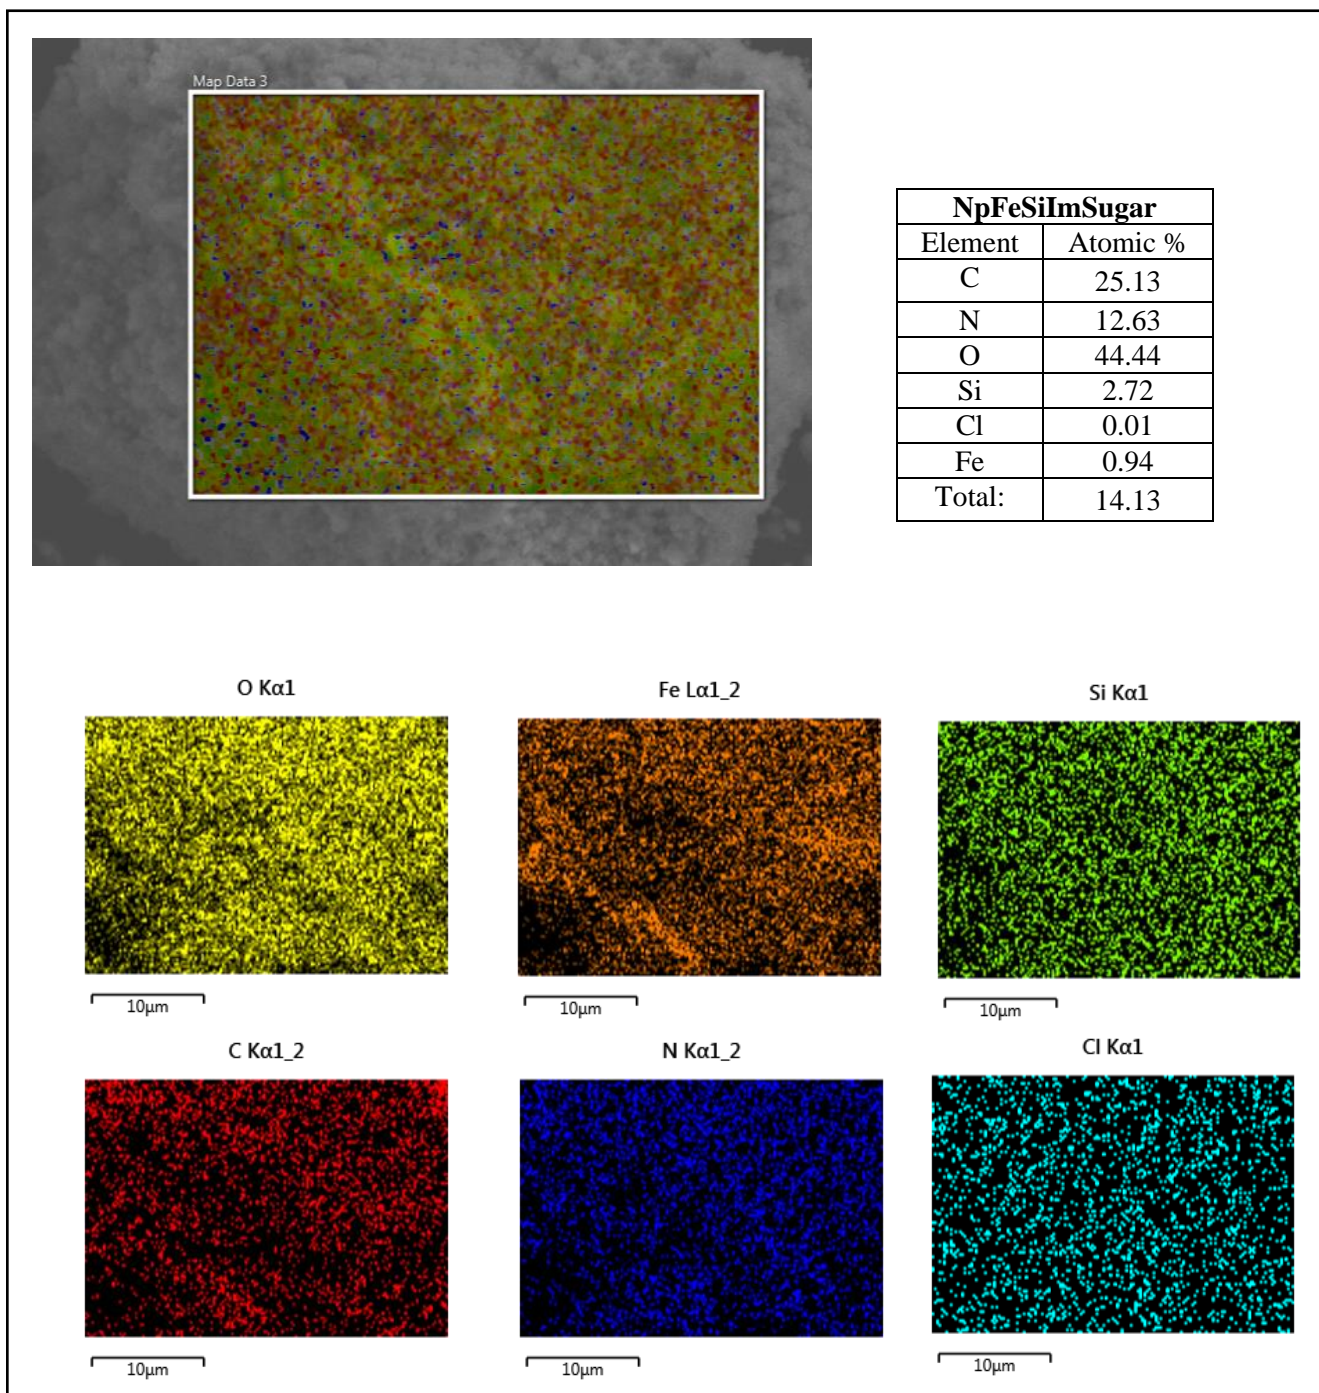

**S 6:** EDX analysis of surface functionalized nanoparticles NpFeSiIm and NpFeSiImSugar

# Sugar based cationic magnetic core-shell silica nanoparticles for nucleic acid extraction

Tammar Hussein Ali\*, Amar Mousa Mandal, Thorsten Heidelberg, and Rusnah Syahila Duali

Hussen

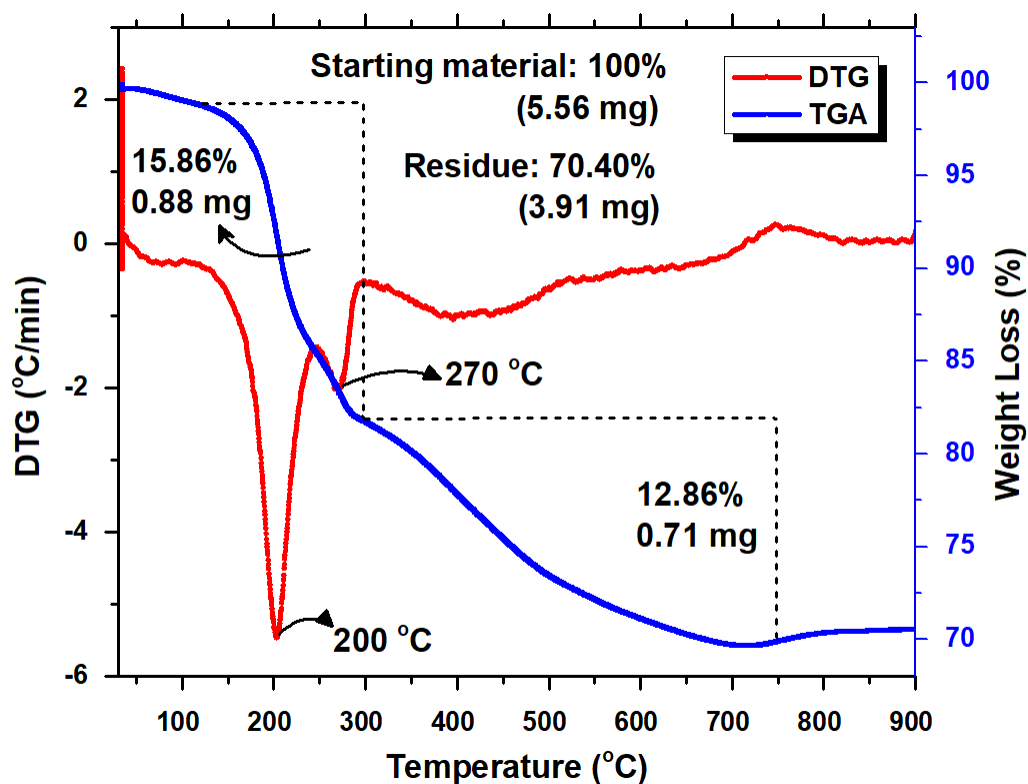

S 7: TG-DTA analysis of magnetic NpFeSiIm



# Sugar based cationic magnetic core-shell silica nanoparticles for nucleic acid extraction

Tammar Hussein Ali\*, Amar Mousa Mandal, Thorsten Heidelberg, and Rusnah Syahila Duali

Hussen

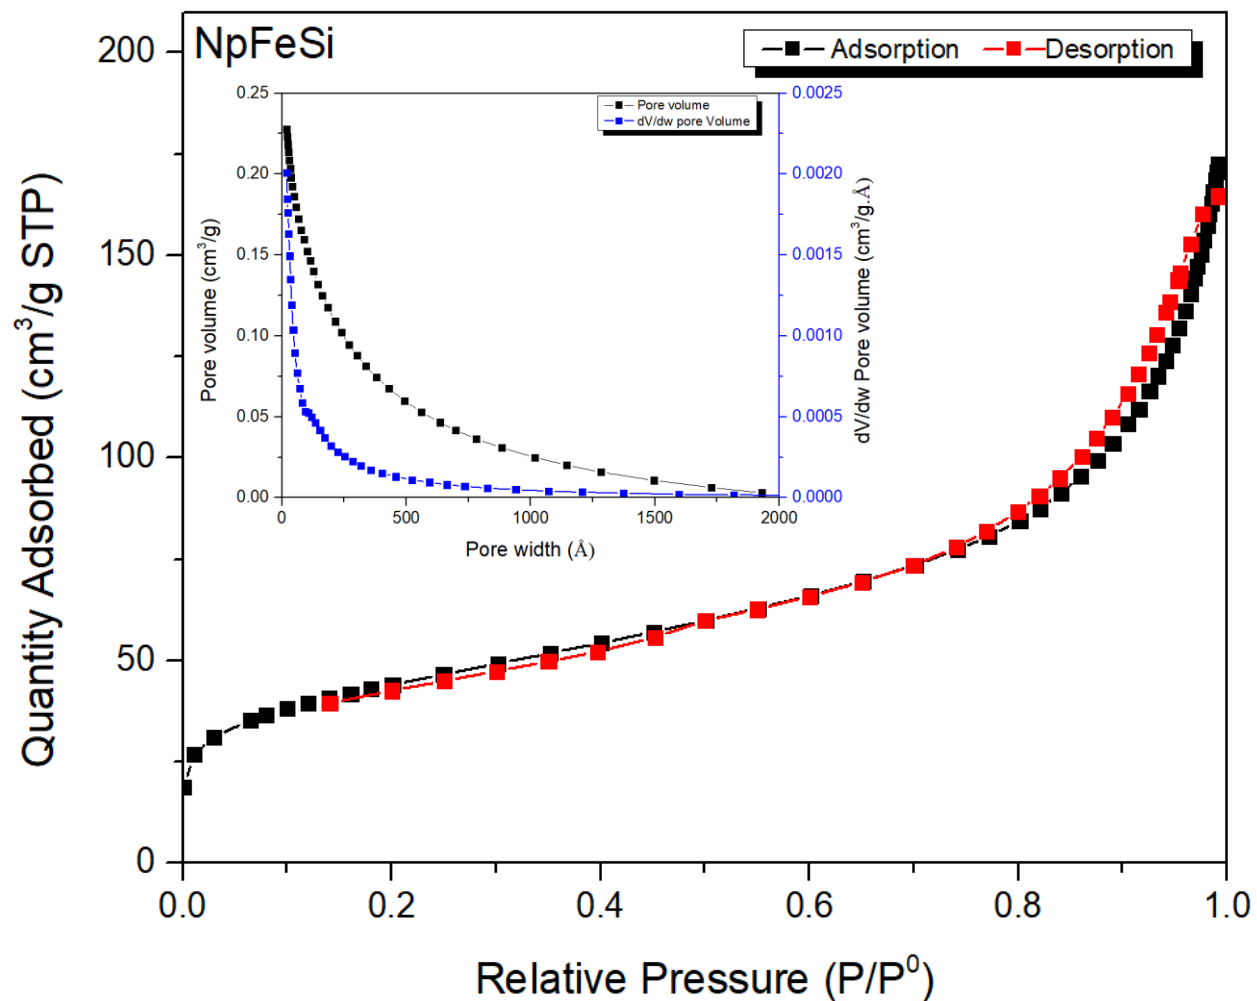

S 8: Nitrogen adsorption-desorption curve of NpFeSi nanoparticle. The inset shows pore volume profile

# Sugar based cationic magnetic core-shell silica nanoparticles for nucleic acid extraction

Tammar Hussein Ali\*, Amar Mousa Mandal, Thorsten Heidelberg, and Rusnah Syahila Duali

Hussen

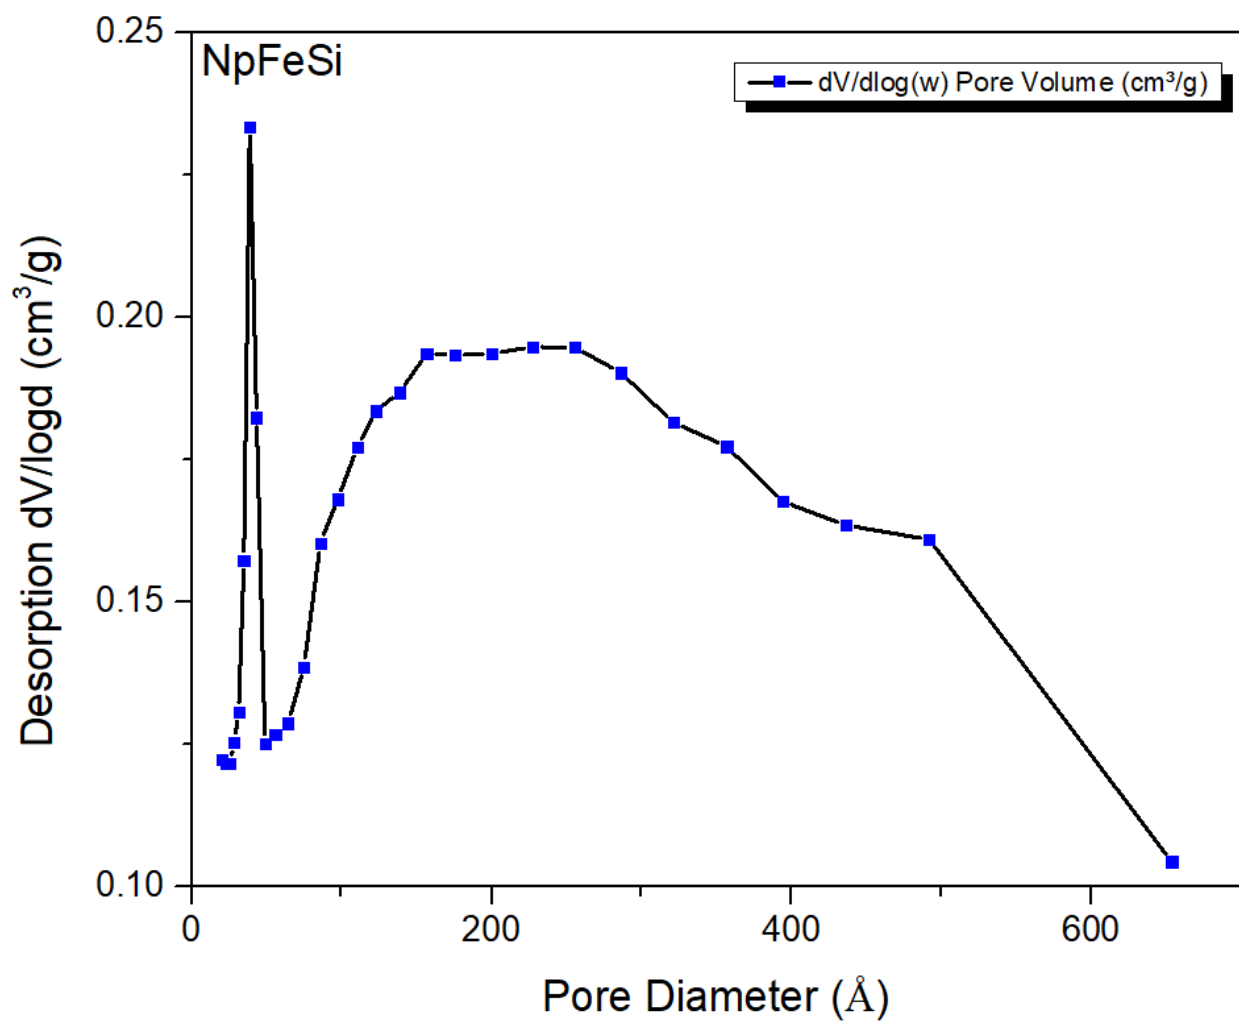

S 9: Shows pore size distribution profile of NpFeSi nanoparticles.

# Sugar based cationic magnetic core-shell silica nanoparticles for nucleic acid extraction

Tammar Hussein Ali\*, Amar Mousa Mandal, Thorsten Heidelberg, and Rusnah Syahila Duali

Hussen

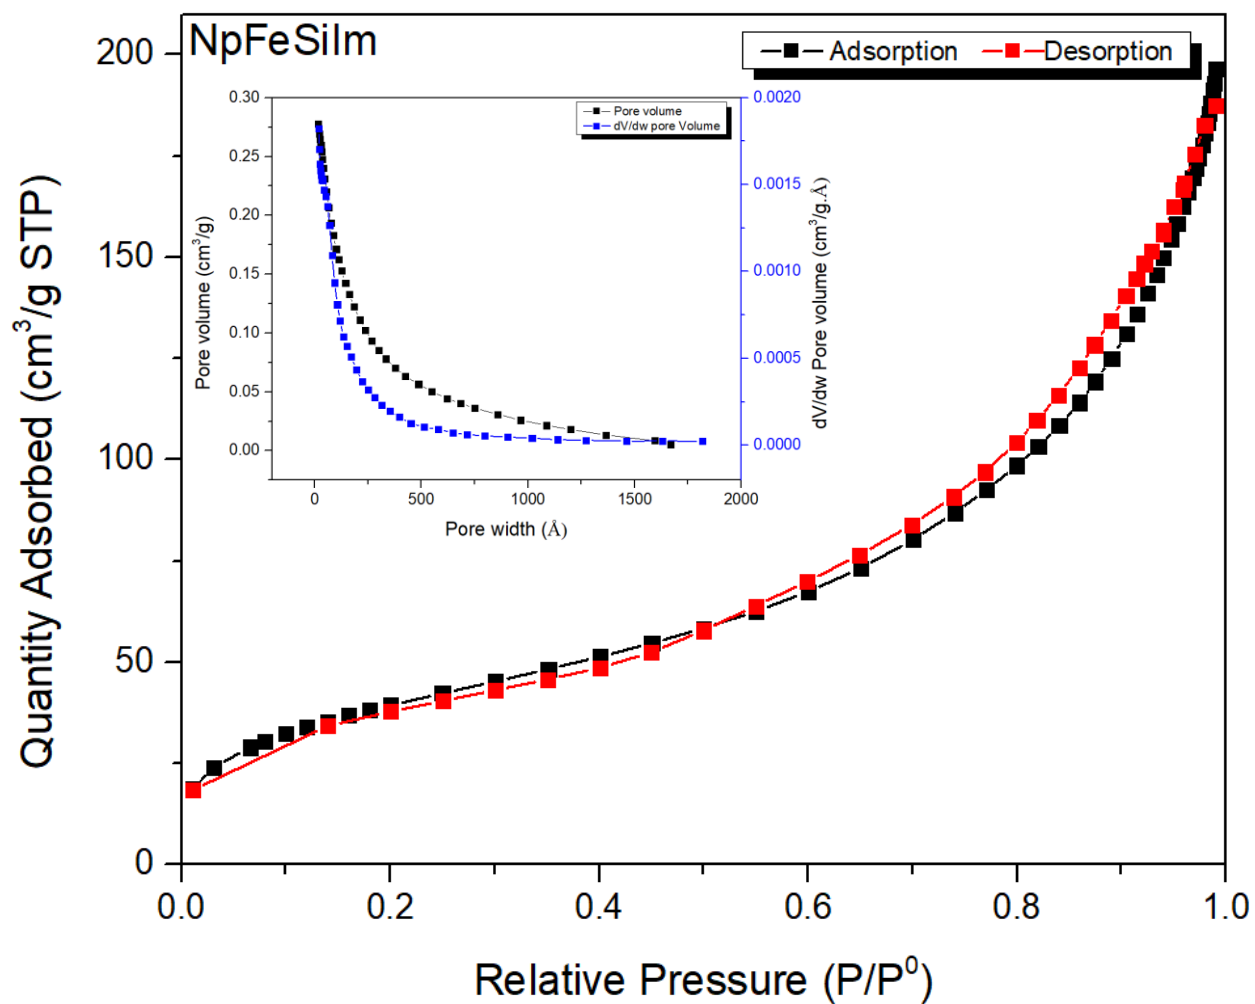

**S 10:** Nitrogen adsorption-desorption curve of NpFeSiIm nanoparticle. The inset shows pore volume profile

**Sugar based cationic magnetic core-shell silica nanoparticles for nucleic acid extraction**

*Tammar Hussein Ali\*, Amar Mousa Mandal, Thorsten Heidelberg, and Rusnah Syahila Duali*

*Hussen*

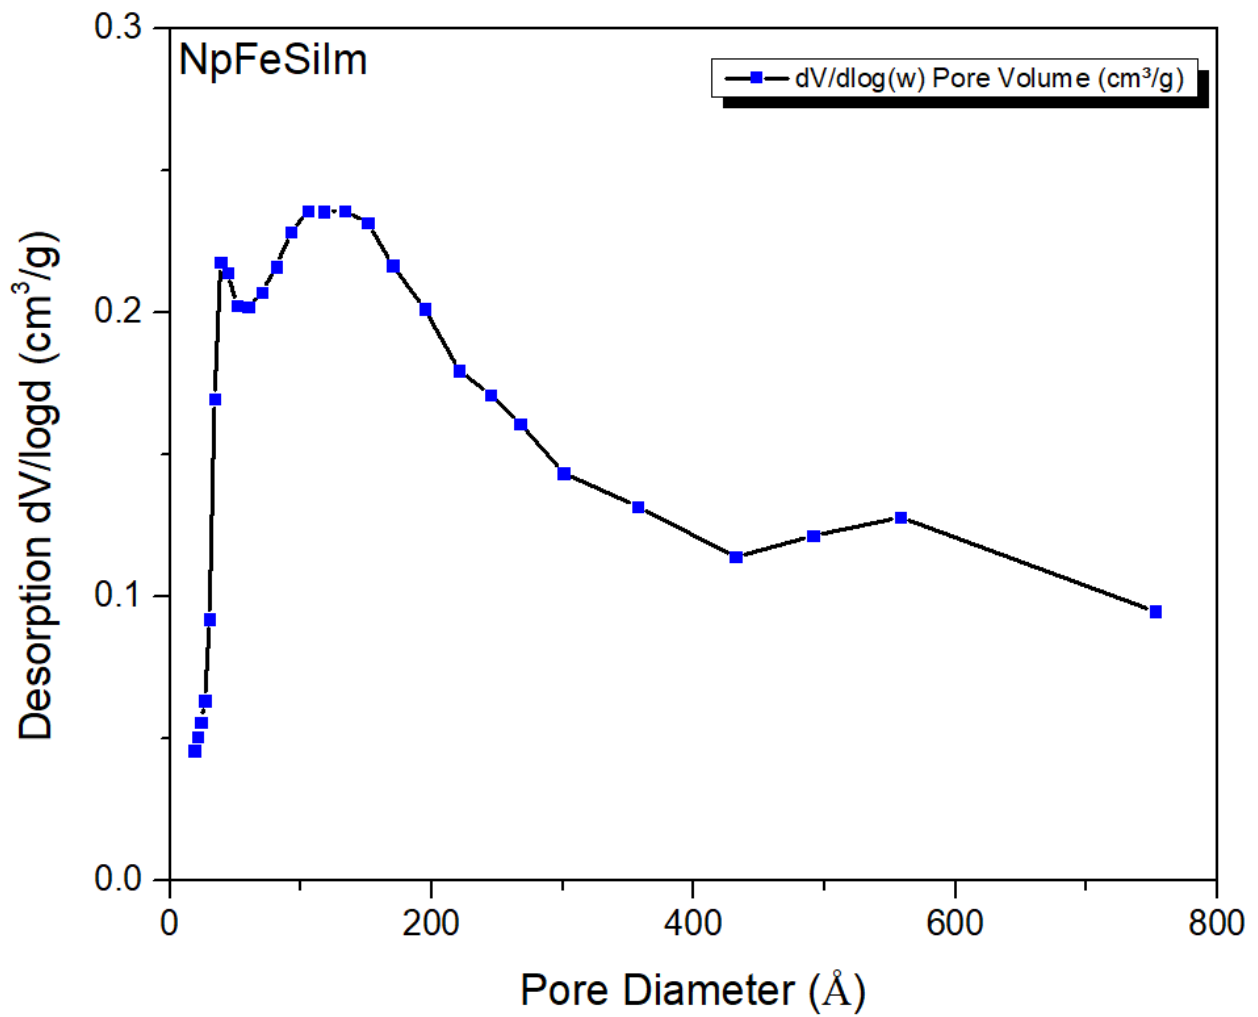

**S 11:** Shows pore size distribution profile of NpFeSiIm nanoparticles.

# Sugar based cationic magnetic core-shell silica nanoparticles for nucleic acid extraction

Tammar Hussein Ali\*, Amar Mousa Mandal, Thorsten Heidelberg, and Rusnah Syahila Duali

Hussen

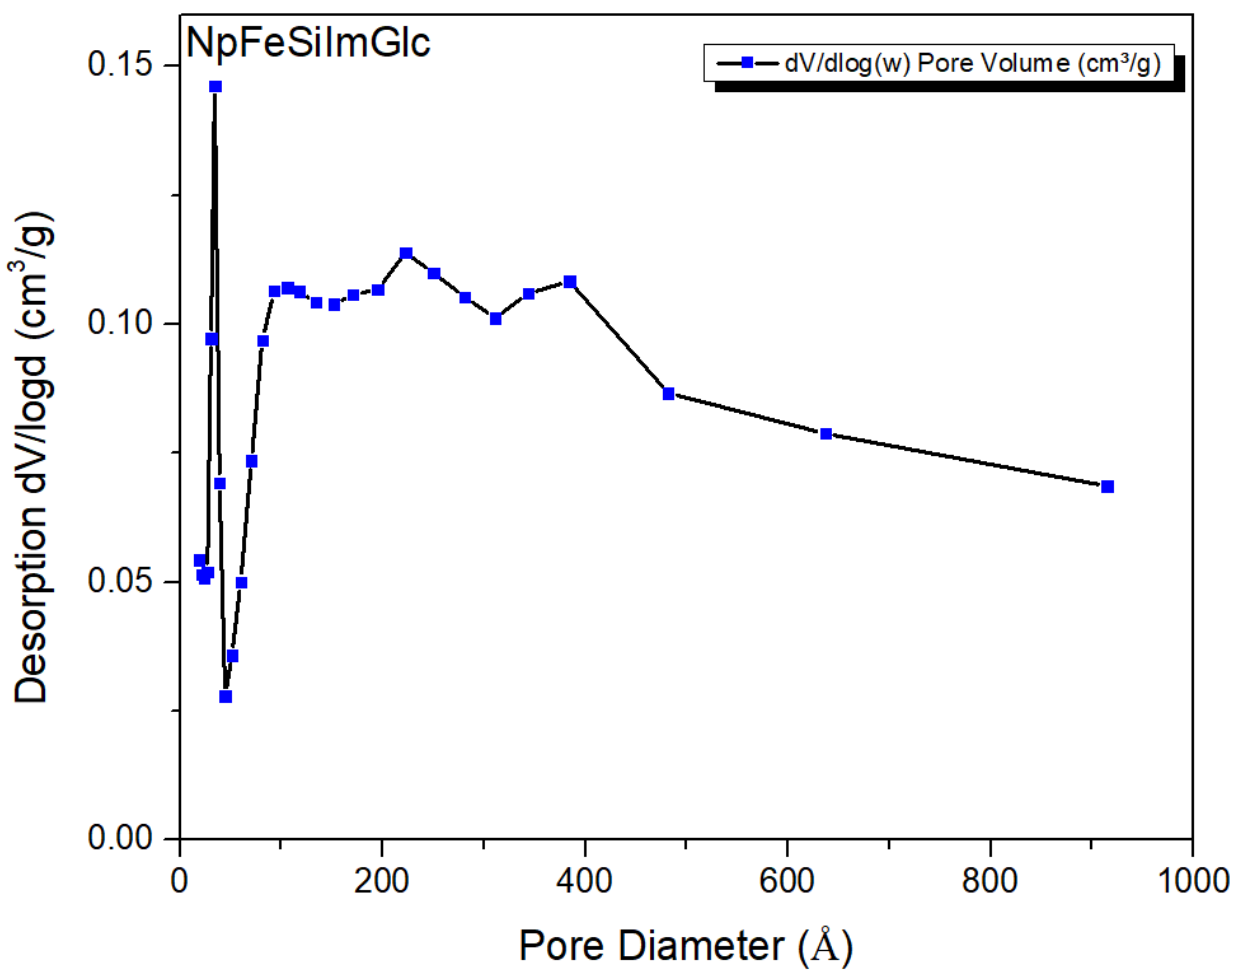

S 12: Shows pore size distribution profile of NpFeSiImGlc nanoparticles.

# Sugar based cationic magnetic core-shell silica nanoparticles for nucleic acid extraction

Tammar Hussein Ali\*, Amar Mousa Mandal, Thorsten Heidelberg, and Rusnah Syahila Duali

Hussen

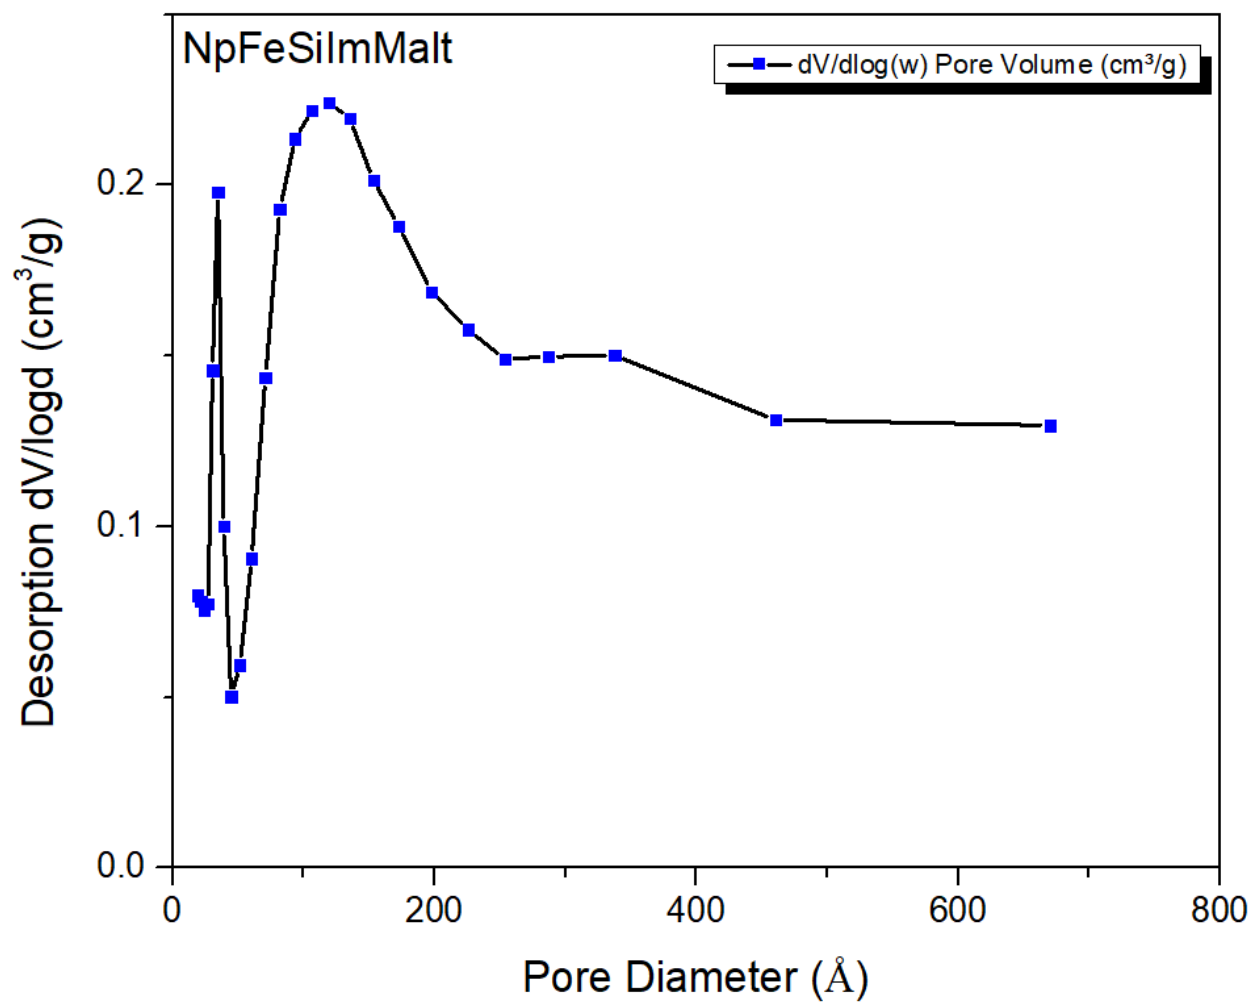

S 13: Shows pore size distribution profile of NpFeSiImMalt nanoparticles.
